# Supplementary material for: Efficient DNA and siRNA delivery with biodegradable cationic hyaluronic acid conjugates
Source: Royal Society of Chemistry journal article supplement (doi:10.1039/c3ra42013b), 2013-01-01
Supplement: c3ra42013b.pdf [file c3ra42013b.pdf]

## SUPPLEMENTARY INFORMATION

### **Efficient DNA and siRNA delivery with biodegradable cationic hyaluronic acid conjugates**

Sushil K. Tripathi,<sup>‡a</sup> Saloni Gupta<sup>a</sup>, Kailash C. Gupta<sup>a,b</sup>, Pradeep Kumar<sup>\*,a</sup>

<sup>a</sup>Nucleic Acids Research Laboratory, CSIR-Institute of Genomics and Integrative Biology, Delhi University Campus, Mall Road, Delhi-110007, India.

<sup>b</sup>CSIR-Indian Institute of Toxicology Research, M.G. Marg, Lucknow-226001, India

<sup>‡</sup> Present Address: Department of Radiology, Thomas Jefferson University, 1020 Locust Street, Philadelphia, PA 19107, USA

Table S1: Calculation of N/P ratios of pDNA complexes of HP conjugates and bPEIs (25 and 1.8 kDa) at their corresponding weight ratios.

| HP1/pDNA |     | HP2/pDNA |     | HP3/pDNA |     | HP4/pDNA |     | bPEI25/pDNA |      | bPEI1.8/pDNA |      |
|----------|-----|----------|-----|----------|-----|----------|-----|-------------|------|--------------|------|
| w/w      | N/P | w/w      | N/P | w/w      | N/P | w/w      | N/P | w/w         | N/P  | w/w          | N/P  |
| 33.33    | 252 | 33.33    | 250 | 33.33    | 248 | 33.33    | 244 |             |      |              |      |
| 36.00    | 272 | 36.00    | 270 | 36.00    | 268 | 36.00    | 263 |             |      |              |      |
| 40.00    | 302 | 40.00    | 300 | 40.00    | 297 | 40.00    | 292 |             |      |              |      |
| 43.33    | 327 | 43.33    | 325 | 43.33    | 322 | 43.33    | 317 |             |      |              |      |
| 50.00    | 378 | 50.00    | 375 | 50.00    | 372 | 50.00    | 366 |             |      |              |      |
| 56.66    | 428 | 56.66    | 425 | 56.66    | 421 | 56.66    | 414 |             |      |              |      |
|          |     |          |     |          |     |          |     | 1.00        | 7.7  | 1.00         | 7.7  |
|          |     |          |     |          |     |          |     | 1.66        | 12.8 | 1.66         | 12.8 |
|          |     |          |     |          |     |          |     | 2.33        | 18   | 2.33         | 18   |
|          |     |          |     |          |     |          |     | 3.33        | 25.7 | 3.33         | 25.7 |
|          |     |          |     |          |     |          |     | 5.00        | 38.7 | 5.00         | 38.7 |
|          |     |          |     |          |     |          |     | 6.66        | 51.5 | 6.66         | 51.5 |
